# Supplementary material for: Growth Hormone (GH) and Rehabilitation Promoted Distal Innervation in a Child Affected by Caudal Regression Syndrome
Source: Int J Mol Sci. 2017 Jan 23;18(1):230. doi: 10.3390/ijms18010230 (PMC5297859; doi:10.3390/ijms18010230)
Supplement: Supplementary file 1 [file ijms-18-00230-s001.zip]

Archive with 8 entries (8 files):
- Movie 4.mp4
- Movie 5.mp4
- Movie 6.mp4
- Movie 7.mp4
- movie legend.pdf
- Movie 1.mp4
- Movie 2.mp4
- Movie 3.mp4
